# Supplementary material
Source: PubMed Central journal article supplement (PMC4972715)

**Figure S1:** KLF6 mRNA expression is unchanged between uninvolved and involved colon tissue of Crohn's colitis patients. mRNA was prepared from paired colon biopsies from Crohn's colitis patients, and analyzed for gene expression of KLF6. Lines represent individual patients; n=11.

Formatted: Font: Italic

Formatted: Font: Not Bold

**Figure S2S2:** KLF6 mRNA expression is elevated in TNF<sup>ΔARE/+</sup> model of ileitis. Ileal tissue from TNF<sup>ΔARE/+</sup> mice expresses elevated levels of KLF6. Ileal tissue was harvested and cDNA was analyzed for KLF6 Klf6 gene expression by qPCR; \* $p \leq 0.01$ . n=4 animals/group.

Formatted: Font: Italic

Formatted: Font: Italic

Formatted: Font: Italic

**Figure S2S3:** Human macrophages modulate expression of KLF6 in response to pro- and anti-inflammatory cytokine signaling. (A-B) Monocyte-derived macrophages were obtained from healthy donors and stimulated *ex vivo* with pro-inflammatory IFN $\gamma$  or TNF (A), or with anti-inflammatory IL-10 or TGF $\beta$  (B). RNA and protein was isolated from treated cells and assessed for KLF6 expression by qPCR or western blot. \*\* $p \leq 0.001$ ; n=3.

Supplemental Figure S1

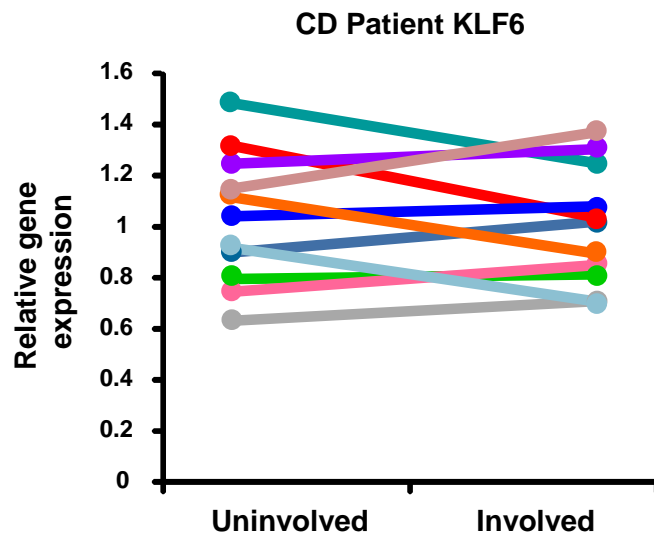

Supplemental Figure S2

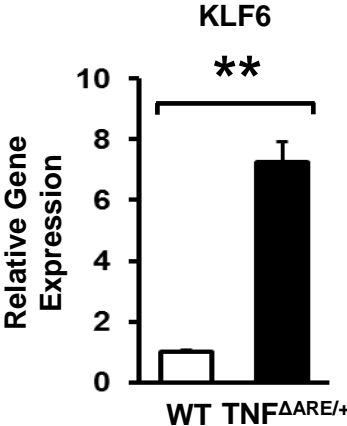

## Supplemental Figure S3

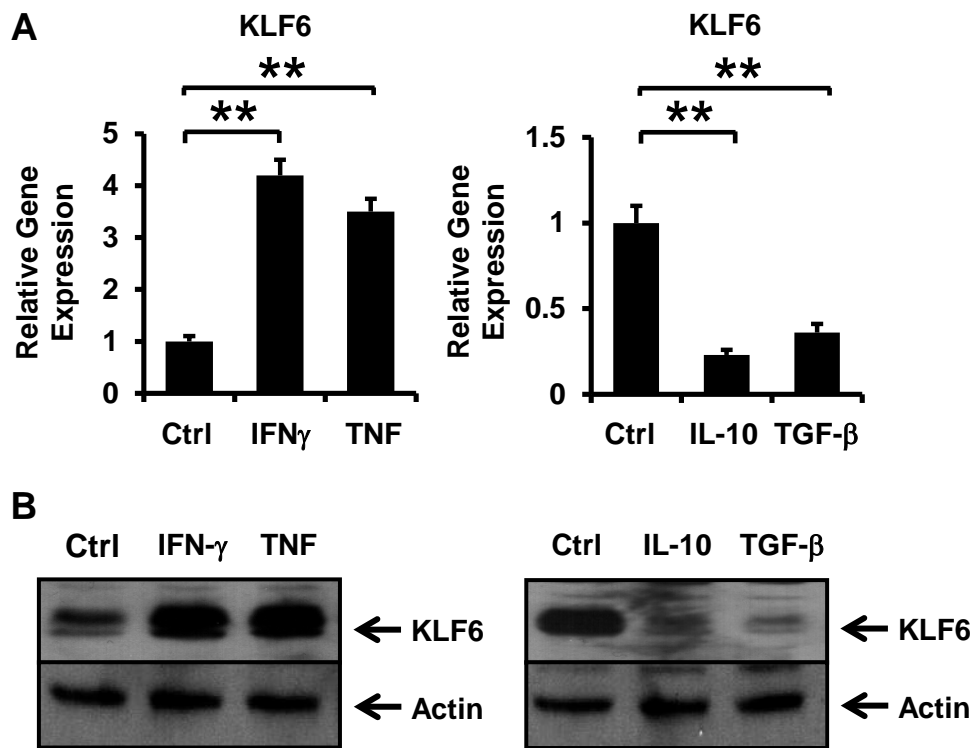

Supplement: NIHMS748569-supplement-01.pdf [file NIHMS748569-supplement-01.pdf]
